# Supplementary material
Source: Springer Nature journal article supplement (https://www.springermedizin.de/resource/supplementary/13048_2013_236_MOESM6_ESM.pdf/9665192)

Additional fig.5: qPCR of selected genes in HOC-7 ovarian cancer cells

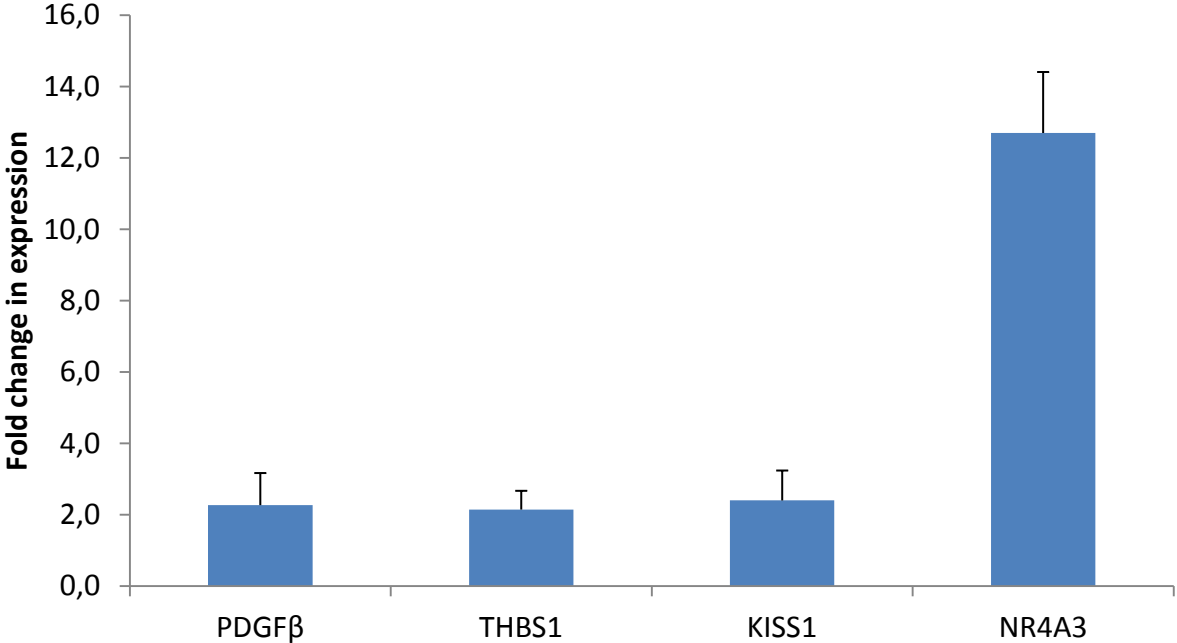

Supplement: MOESM6 [file 9665192]
